# Supplementary material for: 50-летняя История кафедры оториноларингологии, стоматологии
Source: Royal Society of Chemistry journal article supplement (doi:10.1039/d2ay01178f), 2015-08-25
Supplement: d2ay01178f1.pdf [file d2ay01178f1.pdf]

### Electronic Supplementary Information

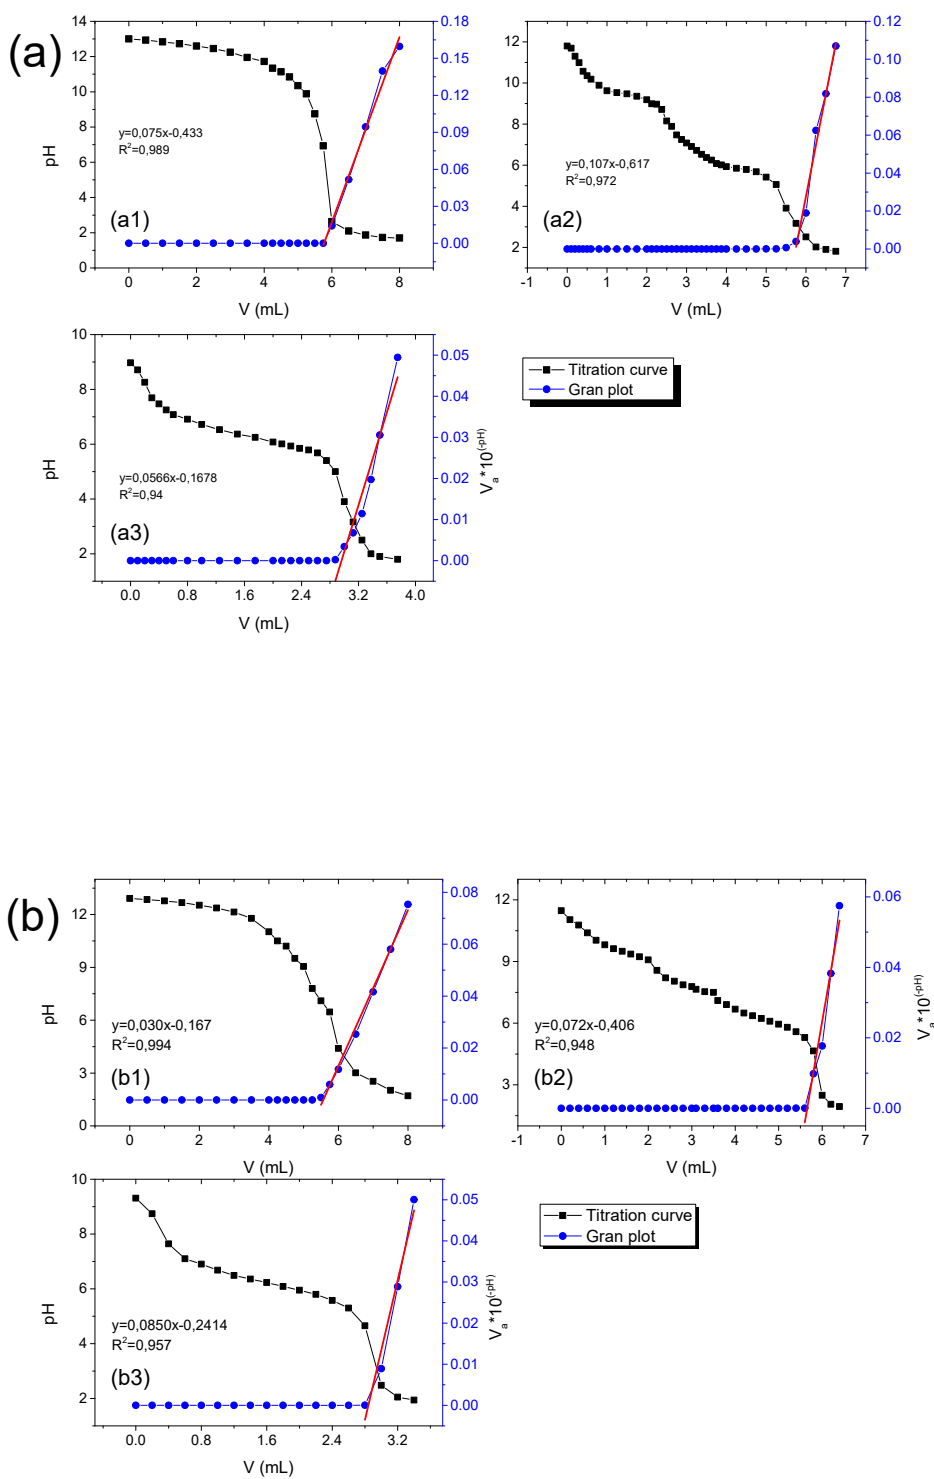

## Electronic Supplementary Information

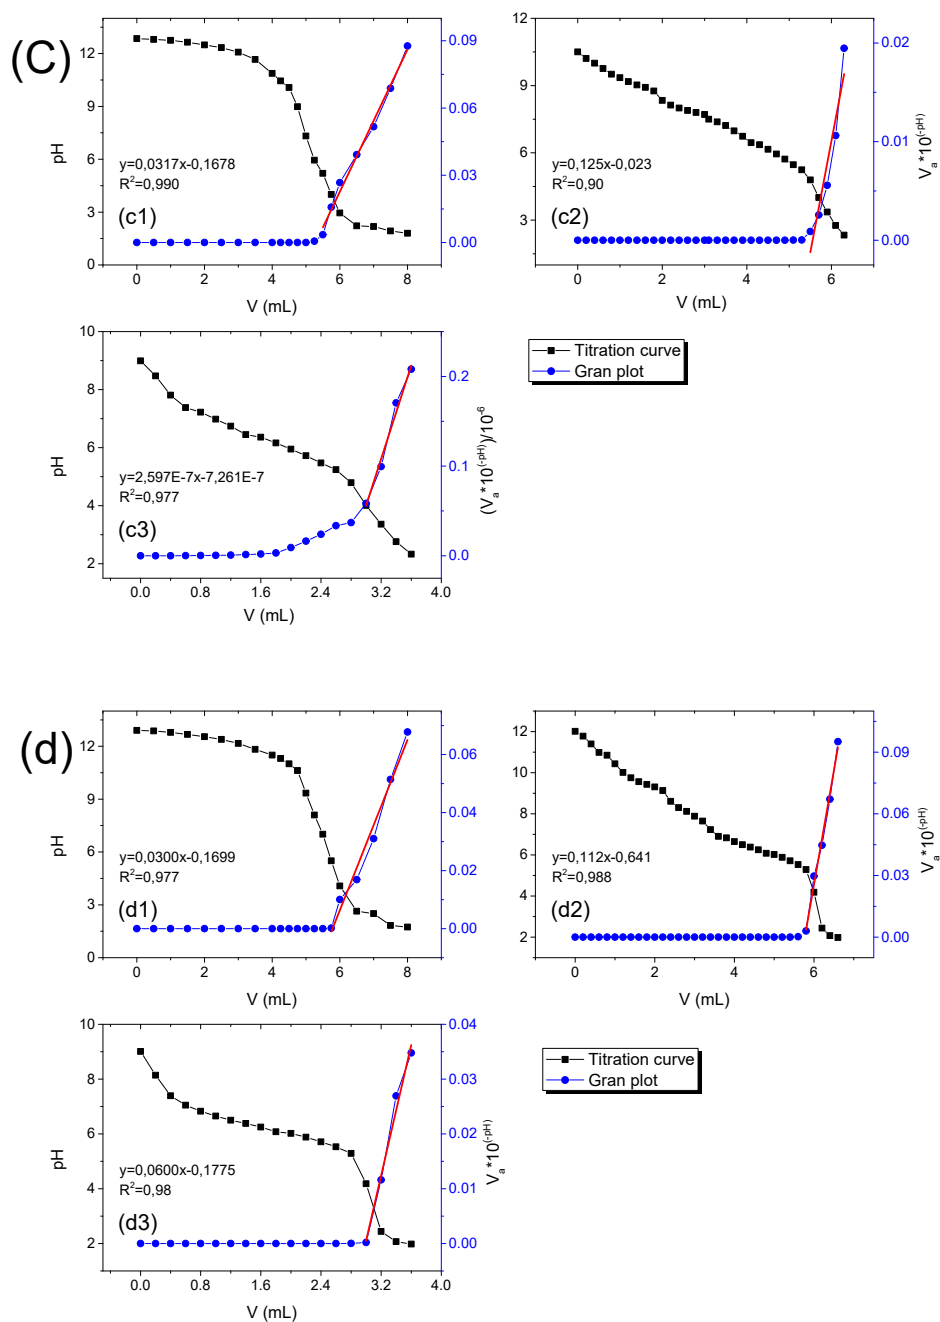

**Figure S1:** Boehm titration curves and Gran plot for: (a) blank; (a1) 0.1 mol L<sup>-1</sup> NaOH system, (a2) 0.05 mol L<sup>-1</sup> Na<sub>2</sub>CO<sub>3</sub> system, (a3) 0.05 mol L<sup>-1</sup> KHCO<sub>3</sub> system; (b) graphite powder; (b1) 0.1 mol L<sup>-1</sup> NaOH system, (b2) 0.05 mol L<sup>-1</sup> Na<sub>2</sub>CO<sub>3</sub> system, (b3) 0.05 mol L<sup>-1</sup> KHCO<sub>3</sub> system; (c) carbon black, (c1) 0.1 mol L<sup>-1</sup> NaOH system, (c2) 0.05 mol L<sup>-1</sup> Na<sub>2</sub>CO<sub>3</sub> system, (c3) 0.05 mol L<sup>-1</sup> KHCO<sub>3</sub> system; (d) carbon nanotubes (d1) system with NaOH 0.1 mol L<sup>-1</sup>, (d2) system with Na<sub>2</sub>CO<sub>3</sub> 0.05 mol L<sup>-1</sup>, (d3) system with KHCO<sub>3</sub> 0.05 mol L<sup>-1</sup>.

## Electronic Supplementary Information

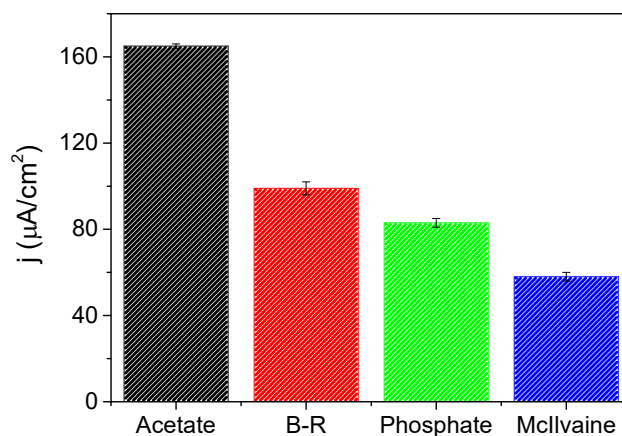

**Figure S2:** Current density of second peak for the following buffer solutions: acetate, B-R, phosphate and Mcllvaine (at  $0.1 \text{ mol L}^{-1}$ , pH 5.0). Experiments were carried out at a scan rate of  $50 \text{ mV s}^{-1}$ .  $[\text{DHP}] = 2 \text{ mmol L}^{-1}$ .

**Table S1:** Evaluation of reproducibility of CB paste electrode response.

| Day                               | 1      | 2      | 3      | 4      | Average value | RSD   |
|-----------------------------------|--------|--------|--------|--------|---------------|-------|
| $j$ ( $\mu\text{A}/\text{cm}^2$ ) | 164.92 | 164.82 | 166.10 | 168.53 | 165.34        | 1.68% |

**Table S2:** Evaluation of precision of CB paste electrode response.

| Measurement                       | 1      | 2      | 3      | 4      | 5             | 6      |
|-----------------------------------|--------|--------|--------|--------|---------------|--------|
| $j$ ( $\mu\text{A}/\text{cm}^2$ ) | 168.51 | 165.50 | 165.68 | 165.16 | 164.15        | 164.34 |
| Measurement                       | 7      | 8      | 9      | 10     | Average value | RSD    |
| $j$ ( $\mu\text{A}/\text{cm}^2$ ) | 163.84 | 163.71 | 165.20 | 163.18 | 164.93        | 0.92%  |

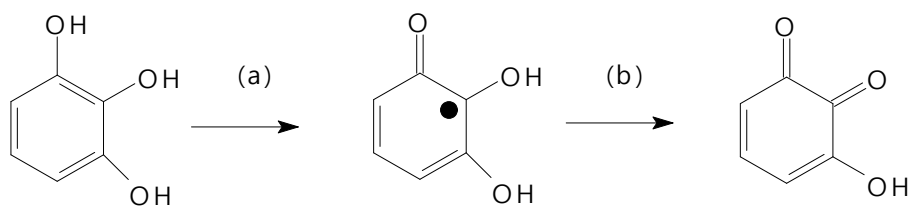

**Scheme S1:** Suggested mechanism of DHP electrooxidation.
